# Supplementary material for: Shape transformation and self-alignment of Fe-based nanoparticles
Source: Royal Society of Chemistry journal article supplement (doi:10.1039/c9na00146h), 2019-01-01

## Supporting Information

### Shape transformation and self-alignment of Fe based nanoparticles

*Hong et al.*

Description of Coffee ring effects

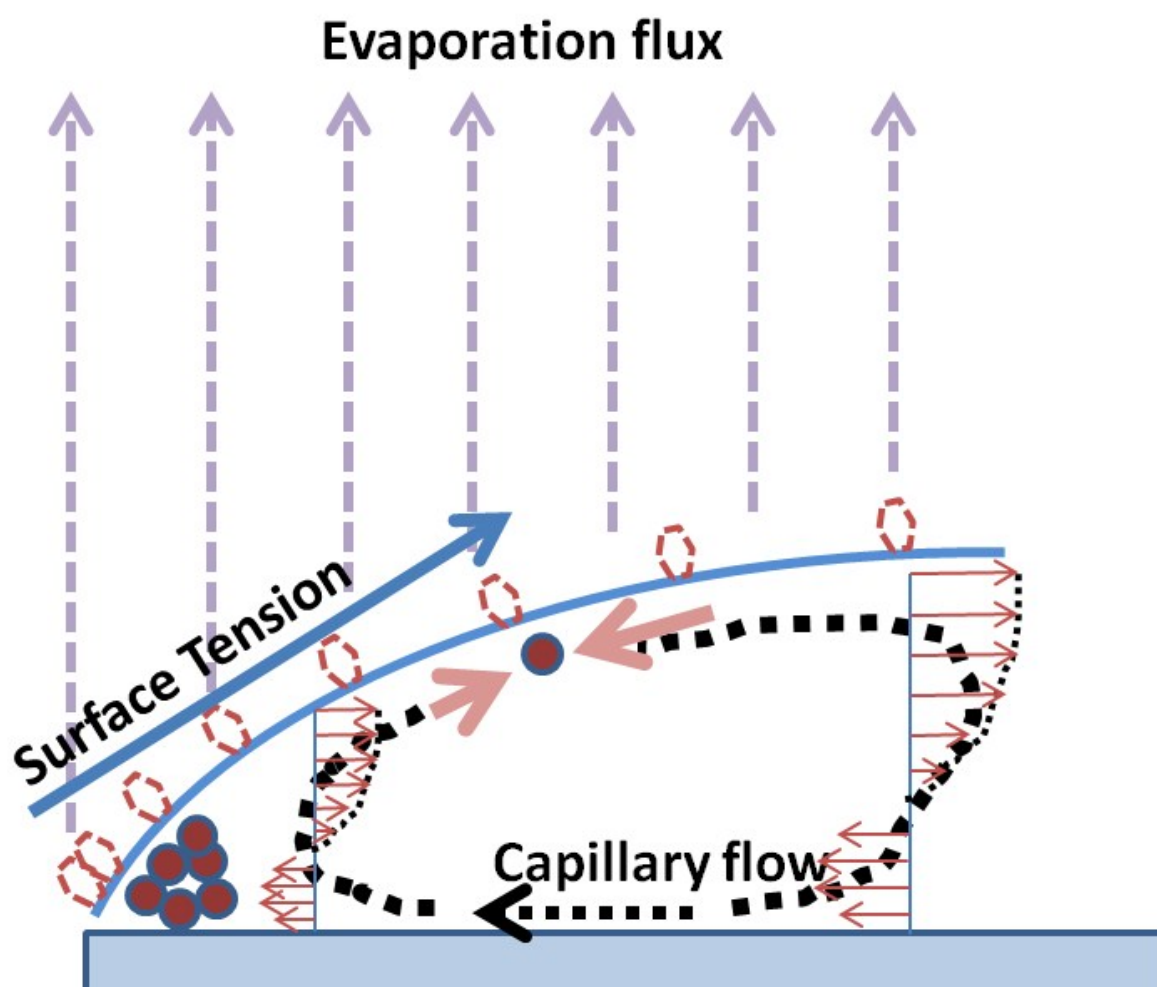

SEM images

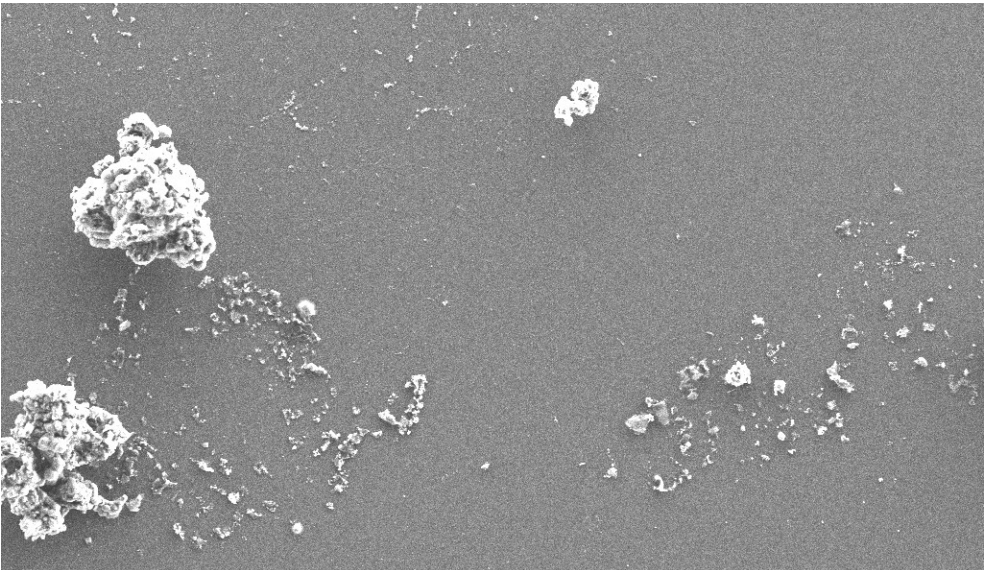

TEM images

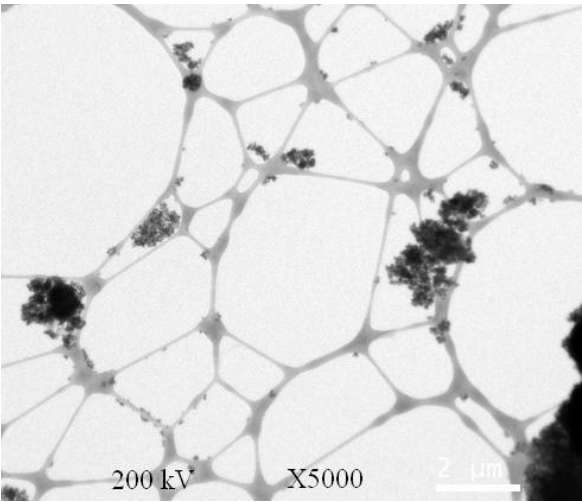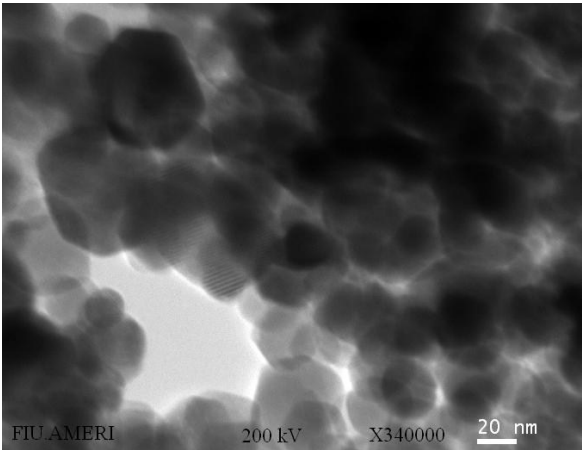

EDX pattern

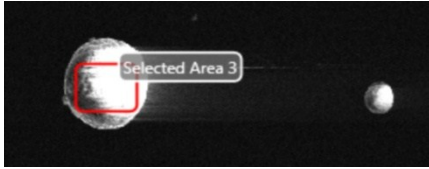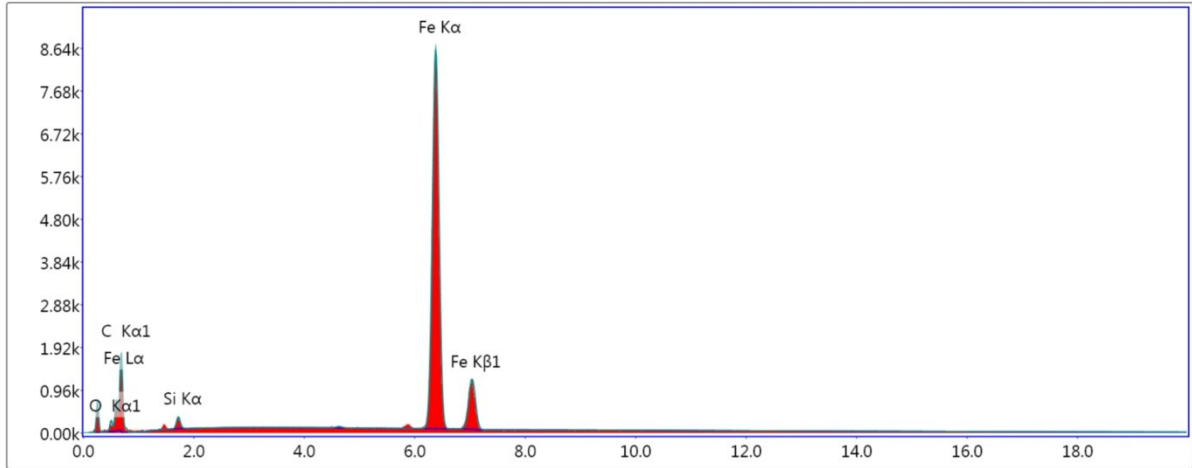

活时间 (秒) : 26.0 0 Cnts 0.000 keV 探测器: Octane Plus Det

| 元素   | 重量%   | 原子%   | 净强度      | Error % | Kratio | Z    | R    | A    | F    |
|------|-------|-------|----------|---------|--------|------|------|------|------|
| C K  | 20.06 | 50.70 | 132.88   | 10.23   | 0.06   | 1.18 | 0.87 | 0.25 | 1    |
| O K  | 3.76  | 7.13  | 59.48    | 12.40   | 0.01   | 1.15 | 0.9  | 0.23 | 1    |
| Si K | 1.42  | 1.53  | 80.12    | 12.53   | 0.01   | 1.07 | 0.95 | 0.34 | 1.01 |
| Fe K | 74.76 | 40.64 | 4,646.81 | 1.21    | 0.70   | 0.93 | 1.03 | 1.01 | 1    |

### X-ray Diffraction (XRD)

The XRD pattern clearly shows the mixed state of the crystal structures from the three signature materials:  $\alpha$ -Fe<sub>2</sub>O<sub>3</sub>,  $\gamma$ -Fe<sub>2</sub>O<sub>3</sub>, and Fe<sub>3</sub>O<sub>4</sub>. Strong peaks are observed at 17 degrees (110) for the square and pyramidal structures together, 50 degrees (024) for the pyramidal structure alone, and 57 degrees (511) for the square structure alone. The peak at 50 degrees (024) is a signature of the 3D pyramidal structure. In addition, we observed that the peak at 17 degrees (110) decays in the circular nanoparticles state. The three peaks at angles of 17°

(110),  $50^\circ$  (024), and  $68^\circ$  (610) indicate the octahedron-tetrahedron lattice structure that is critical for the formation of 3D pyramid-shaped structures.

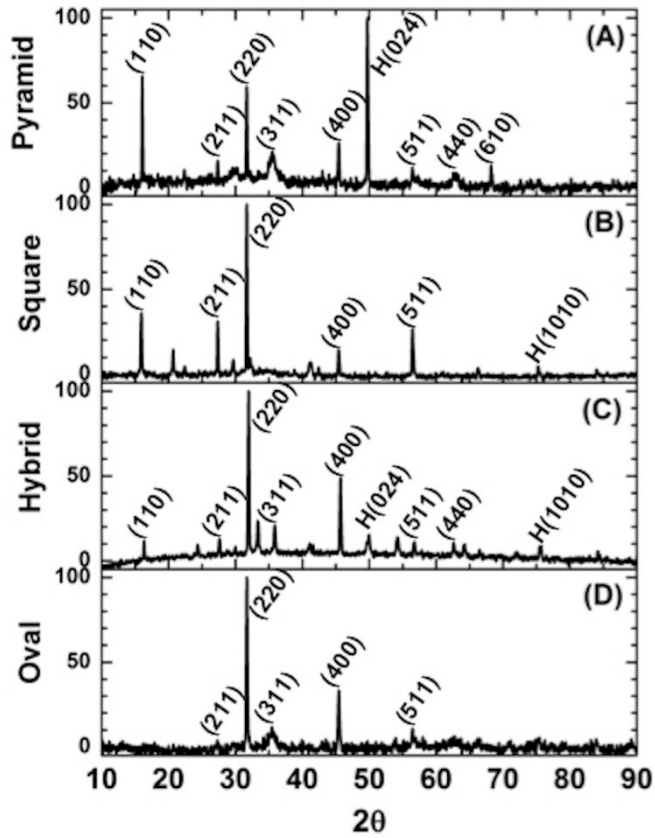

Supplement: c9na00146h1.pdf [file c9na00146h1.pdf]
